# Supplementary material for: MicroRNA 483‐3p overexpression unleashes invasive growth of metastatic colorectal cancer via NDRG1 downregulation and ensuing activation of the ERBB3/AKT axis
Source: PubMed Central journal article supplement (PMC10323897; doi:10.1002/1878-0261.13408), 2023-03-19
Supplement: MOL2-17-1280-s001.pdf [file MOL2-17-1280-s001.pdf]

## **Supplementary Information**

MicroRNA-483-3p overexpression unleashes invasive growth of metastatic colorectal cancer  
*via* NDRG1 downregulation and ensuing activation of the ERBB3/AKT axis

Candiello et al.

**\*Corresponding author:** E-mail: carla.boccaccio@ircc.it

Content:

- 1. Supplementary Figures**
- 2. Supplementary Tables**
- 3. Description of Table S3 (separate .xlsx file)**

# 1. Supplementary Figures

Fig. S1.

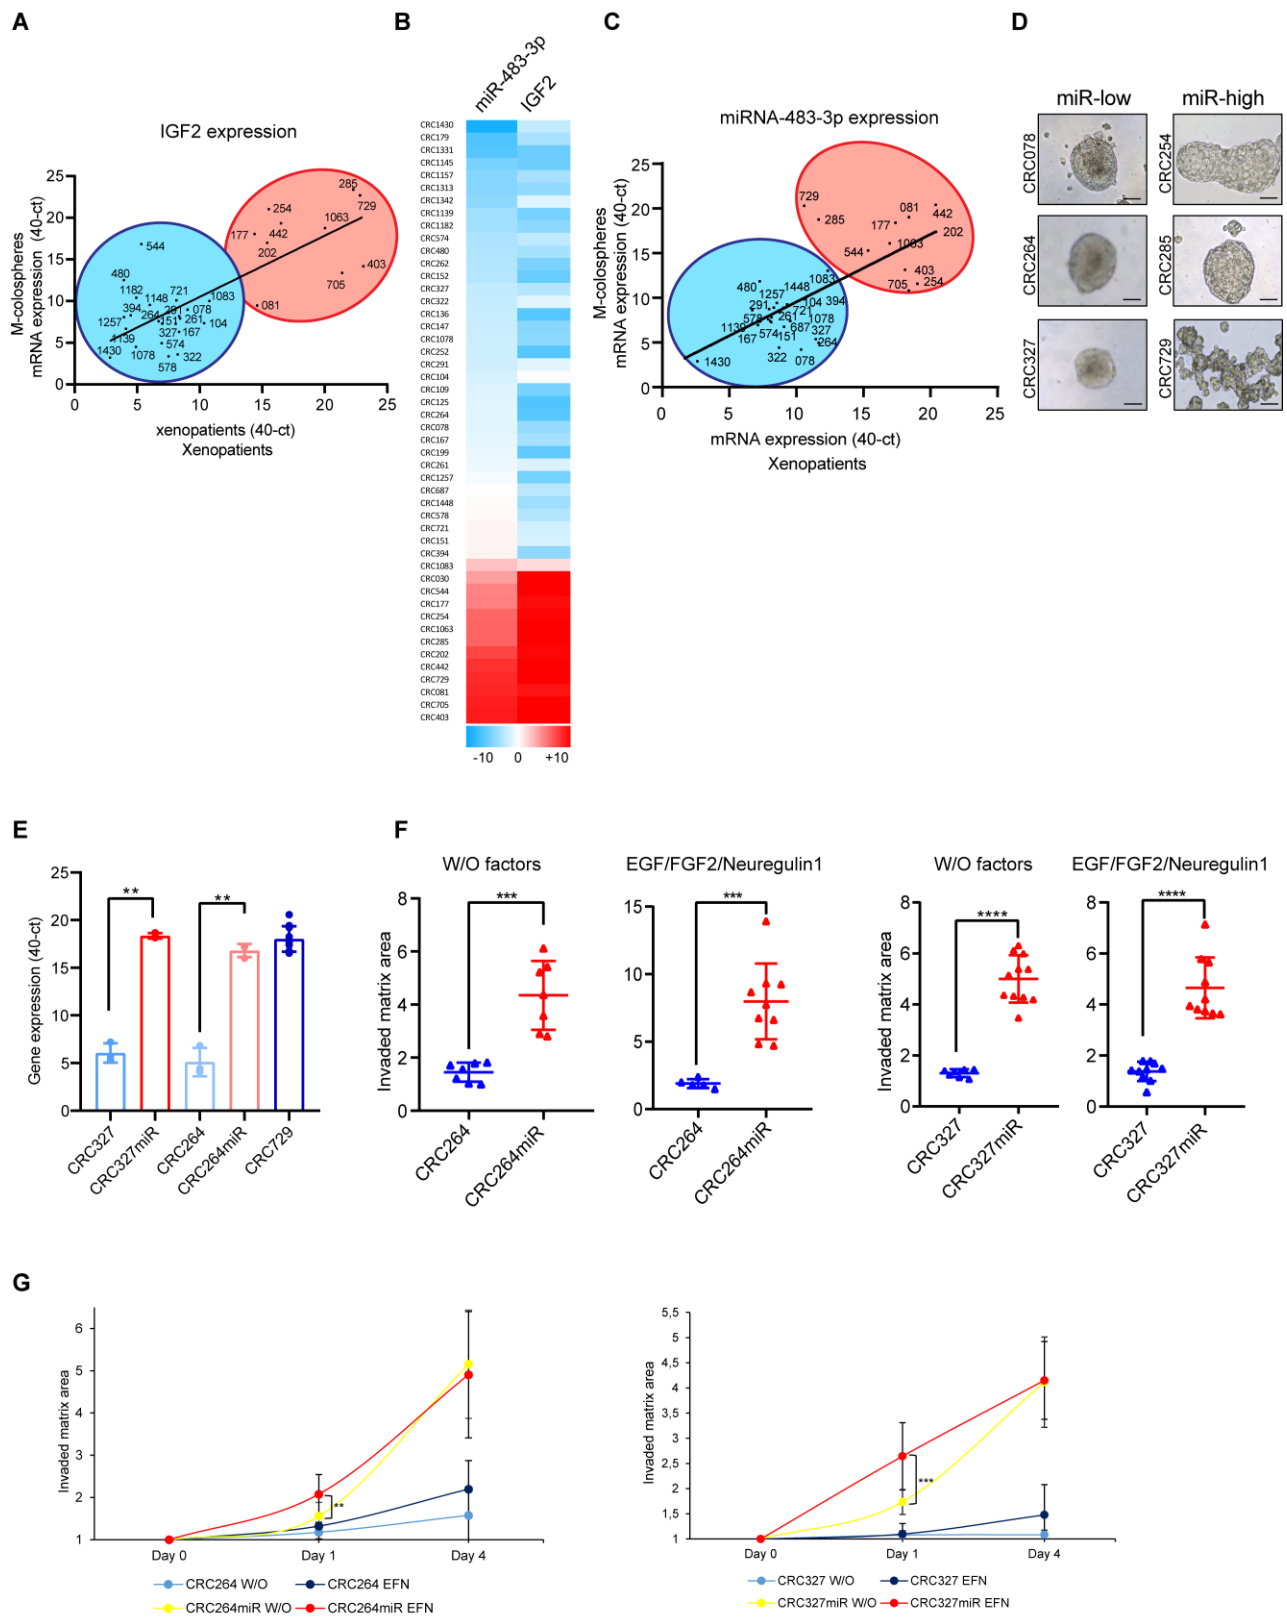

**Fig. S1.** miRNA-483-3p is consistently expressed with IGF2 in CRC and sustains the response to EGFR family ligands. **A** Pearson correlation of *IGF2* mRNA expression measured by qPCR in all available matched m-colospheres and xenopatient (n=33, Table S4), including quadruple WT (n=17) and RAS pathway mutated (n=16) ( $r=0.775$   $P<0.0001$ ). **B** Heatmap showing consistent expression of miRNA-483-3p and *IGF2* in xenopatient (n=48, Table S4); for each sample, expression was calculated by subtracting scaled CT values from the total 40 cycles and represented as average-centered  $\text{Log}_2R$ . **C** Pearson correlation of miRNA-483-3p mRNA expression measured by qPCR in all available matched m-colospheres and xenopatient, including quadruple WT and RAS pathway mutated samples ( $r=0.688$ ,  $P=0.0002$ ). **D** Morphology of m-colospheres natively expressing low (left) or high (right) levels of miRNA-483-3p. Scale bar: 50  $\mu\text{m}$ . **E** Bar graph showing miRNA-483-3p gene expression in m-colospheres transduced with a lentiviral vector encoding miRNA-483-3p vs their parental counterpart. CRC729, endogenously expressing high miRNA-483-3p levels, was used as internal control (CRC327miR vs CRC327: \*\*,  $P=0.0012$ ; C264miR vs CRC264: \*\*,  $P=0.0015$ ; Welch's *t* test). **F, G** Morphometric analyses of areas invaded by spheroids in 3D assays shown in Fig. 1F (n = 3). Box plots **F** represent fold change of areas invaded by each spheroid (dots) at day 4 vs day 0 (n = 3) (left: CRC264miR vs CRC264, w/o factors: \*\*\*,  $P=0.0006$ ; CRC264miR vs CRC264, EFN: \*\*\*,  $P=0.0002$ ; right: CRC327miR vs CRC327, w/o factors: \*\*\*\*,  $P<0.0001$ ; CRC327miR vs. CRC327, EFN: \*\*\*\*,  $P<0.0001$ ; ANOVA Bonferroni Multicomparison test). Curves **G** represent fold change ( $\pm\text{SEM}$ ) of areas invaded by spheroids at different time points in the presence (EFN) or in the absence (w/o) of growth factors (Day 1, CRC264miR EFN vs CRC264miR W/O: \*\*,  $P=0.0028$ ; CRC327miR EFN vs CRC327miR W/O: \*\*\*,  $P=0.0004$ ; ANOVA Bonferroni Multicomparison test). EFN: EGF, FGF2 and neuregulin1.

**Fig. S2.**

**A**

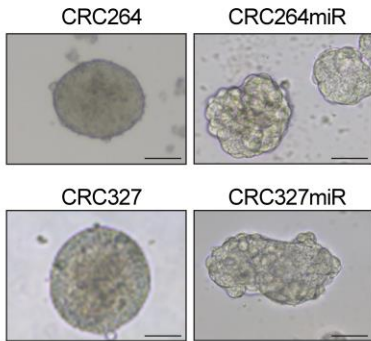

**B**

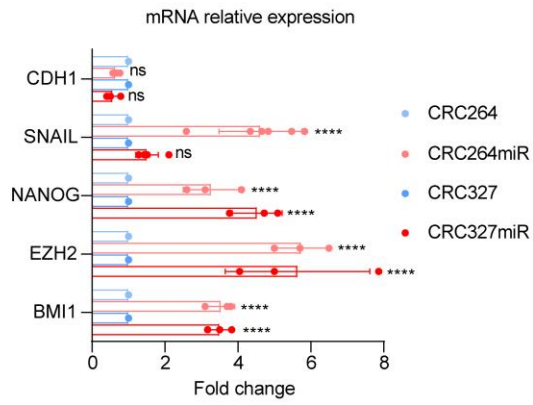

**C**

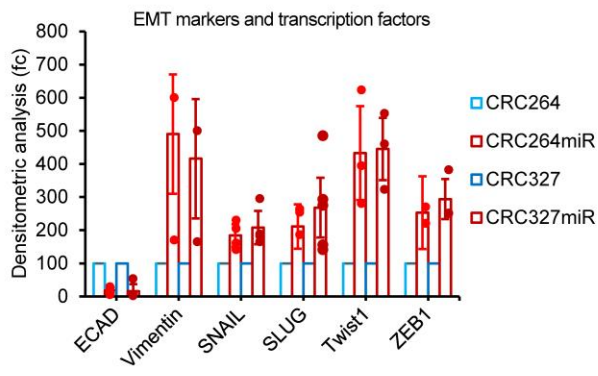

**D**

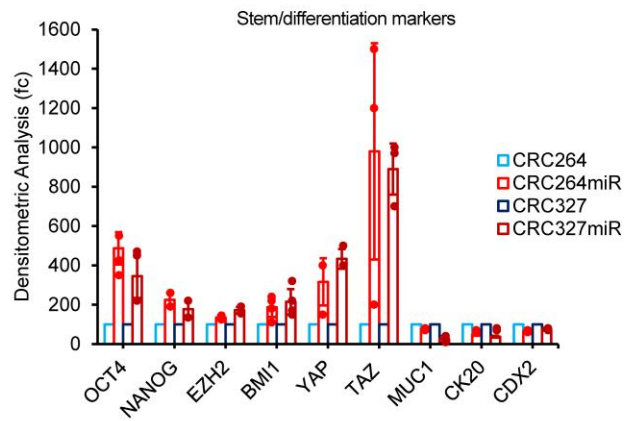

**E**

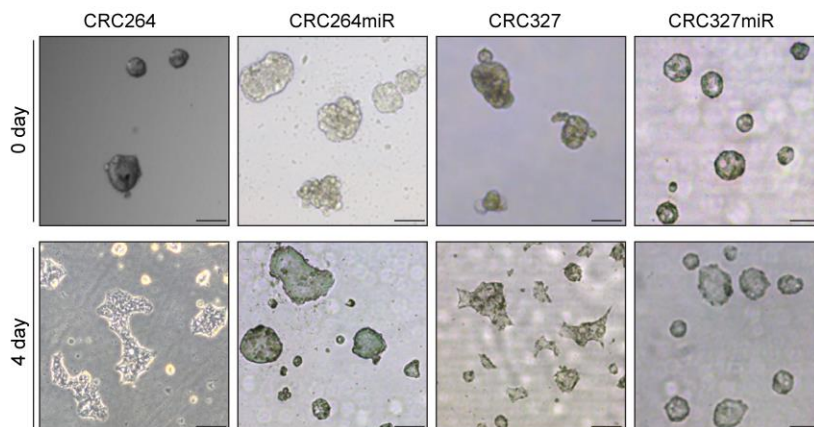

**Fig. S2.** miRNA-483-3p promotes the EMT program and stem-like traits in m-colospheres. **A** Morphology of CRC264miR, CRC327miR and their respective parental m-colospheres. CRC264miR image is a higher magnification part of CRC264miR image shown in panel 2E. Scale bar: 50  $\mu\text{m}$ . **B** Bar graph showing mRNA relative expression (measured by qPCR) of the indicated EMT and stem markers in CRC264miR and CRC327miR vs their respective parental m-colospheres (\*\*\*\*,  $P < 0.0001$ , one-way ANOVA Bonferroni Multicomparison test). *CDHI*: E-cadherin. **C, D** Densitometric analyses of western blots showing EMT core transcription factors (**C**, related to Fig. 2A), and stem and colorectal differentiation markers (**D**, related to Fig. 2D and E) in CRC264, CRC264miR, CRC327 and CRC327miR ( $n > 3$ , values were normalized vs internal loading controls and vs respective parental m-colospheres). **E** Bright field microscopy acquisition of differentiation assays; m-colospheres were cultured for 4 days in pro-differentiating conditions (adhesive substrate and basal medium containing 10% FBS). Scale bar: 100  $\mu\text{m}$ .



**Fig. S3.** miRNA-483-3p targets the metastatic suppressor NDRG1, resulting in upregulation of EGFR family/AKT axis signaling. **A** Differentially regulated genes in CRC327miR vs CRC327 and CRC264miR vs CRC264; x-axis: fold change (log2); y-axis: False Discovery Rate (FDR, -log10). Red dots indicate genes with fold change <0.55 or >1.8 and FDR <0.005. **B** miRNA-483-3p seed sequences in the *NDRG1* 3'UTR (upper panel). Relative *NDRG1* mRNA expression in CRC264miR and CRC327miR vs the corresponding parental m-colospheres (n≥3, \*, *P*=0.0281; \*\*\*, *P*=0.0003; Welch's *t* test; lower panel). **C** *NDRG1* mRNA expression in 39 colorectal cancer cell-lines from Cancer Cell Line Encyclopedia (CCLE) with available RNA-seq and miRNA-seq data, grouped into high vs low miRNA-483-3p expression (*P*=0.043, two tail Wilcoxon test). **D, E** Bar graphs showing miRNA-483-3p (D) and *NDRG1* (E) mRNA expression in CRC cell lines. HCT116 and SW48 cells, expressing low endogenous miRNA-483-3p levels, were transfected with miRNA-483-3p; GP2D cells, expressing high endogenous levels of miRNA483-3p, were transfected with AntagomiR-483-3p sequence. D, miRNA-483-3p expression: HCT116 vs HCT116miR: \*\*\*, *P*=0.0007; SW48 vs SW48miR: \*\*\*, *P*=0.0005; GP2D vs GP2DAntagomiR: \*\*, *P*=0.0019. E, *NDRG1* relative expression, fold change: HCT116 vs HCT116miR: \*\*\*, *P*=0.0005; SW48 vs SW48miR: \*\*, *P*=0.0063; GP2D vs GP2DAntagomiR: \*, *P*=0.0157; Welch's test, n=3. **F** Densitometric analyses of western blots shown in Fig. 3D (n = 3). **G** mRNA relative expression of EGFR family receptors in CRC264miR and CRC327miR vs the respective parental m-colospheres (ns: not significant, one-way ANOVA). **H** Quantification of Proximity Ligation Assays (PLA) shown in Fig. 3F. Box plots indicate the number of red dots (EGFR/ERBB3 or ERBB2/ERBB3 heterodimers) per cell in CRC264 and CRC264miR (left) and CRC327 and CRC327miR (right) (ns, not significant; \*, *P*=0.0127; \*\*\*\*, *P*<0.0001; Kolmogorov-Smirnov test). **I** PLA negative controls stained by one single primary antibody (anti-EGFR). Nuclei were counterstained with DAPI. Scale bar, 50 μm. **J** Densitometric analysis of western blots shown in Fig. 3G (n = 3). **K** Quantification of invasion assays shown in Fig. 3I. Box plots represent fold change of areas invaded by each spheroid (dots) at day 4 vs day 0 (n = 3). Left: C264shSCR vs CRC264shNDRG1: \*\*\*, *P*=0.0004. Right: CRC327shSCR vs CRC327shNDRG1: \*\* *P*=0.0016; ANOVA Bonferroni Multicomparison test. **L** Signaling events in the absence (left) or in the presence (right) of miRNA-483-3p. In the absence, NDRG-1 inhibits EGFR family signaling, preventing E-cadherin transcriptional repression and EMT (EMT OFF). In the presence of miRNA-483-3p, EGFR family signaling is unleashed, leading to AKT activation, GSK3-β inhibition, SNAI1 and SNAI2 stabilization, E-cadherin repression and EMT upregulation (EMT ON). Green stars: activating phosphorylation; red stars: inhibitory phosphorylation.

**Fig. S4.**

**A**

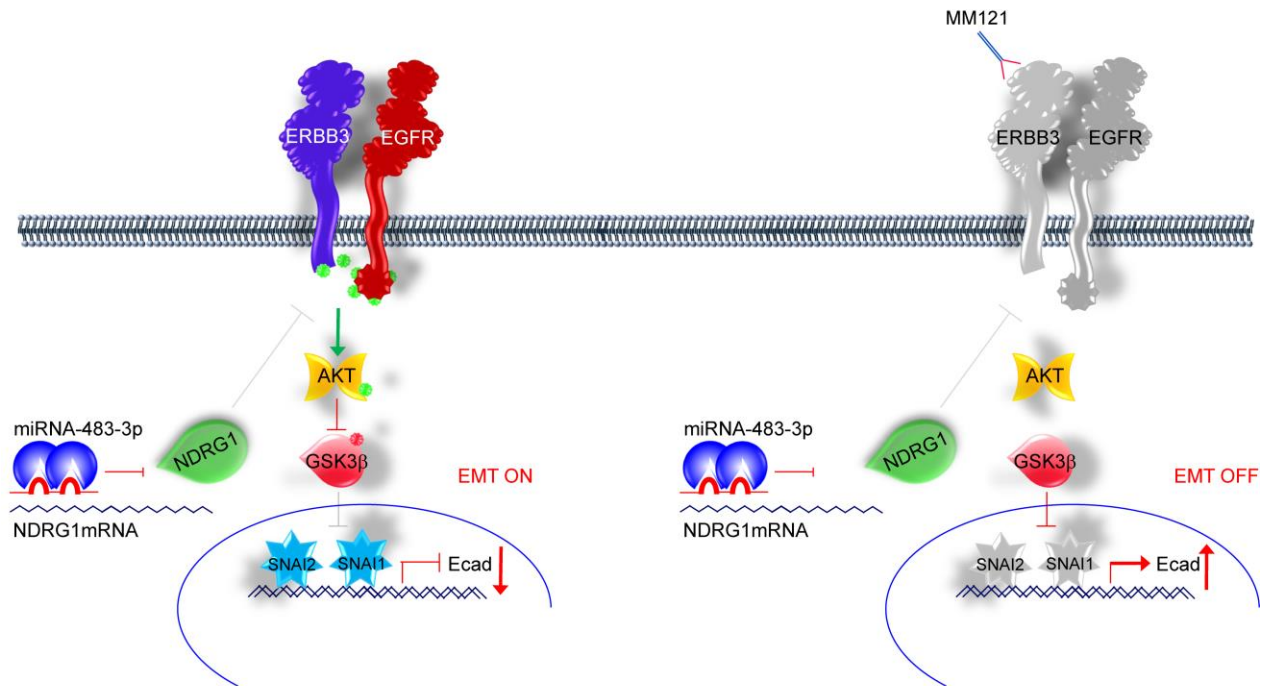

**B**

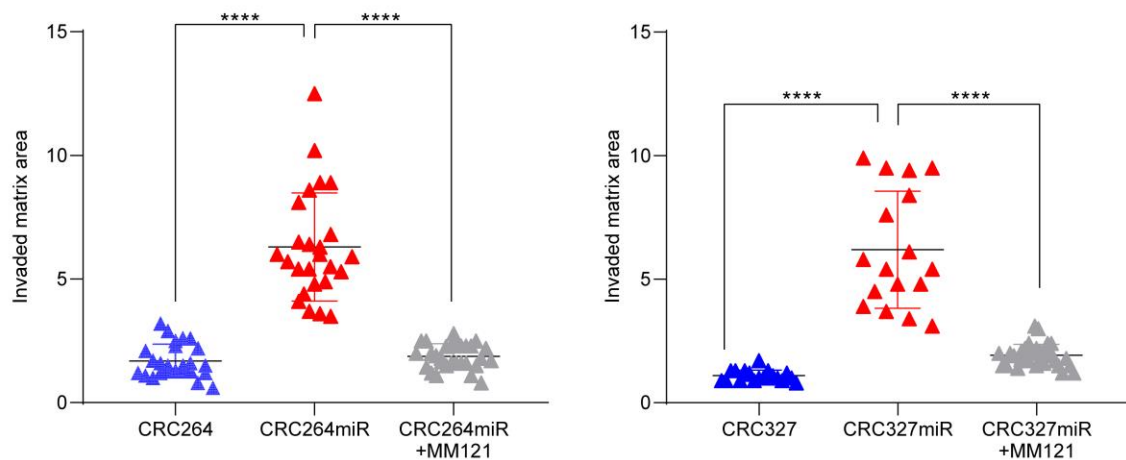

**Fig. S4.** Selective ERBB3 inhibition dampens miRNA-483-3p-induced invasive growth. **A** Schematic representing the MM121 mechanism of action and its outcomes on ERBB3/EGFR downstream signaling and EMT process. **B** Morphometric analyses of areas invaded by spheroids in 3D assays shown in Fig. 4B (n = 3). Box plots represent fold change of areas invaded by each spheroid (dots) at day 4 vs day 0 (n=3). Left: CRC264miR vs CRC264: \*\*\*,  $P=0.0006$ ; CRC264miR + MM121 vs. CRC264miR: \*\*\*\*,  $P<0.0001$ . Right: CRC327miR vs. CRC327: \*\*\*\*,  $P<0.0001$ ; CRC327miR + MM121 vs. CRC327miR: \*\*\*\*,  $P<0.0001$ ; ANOVA Bonferroni Multicomparison test.



**Fig. S5.**

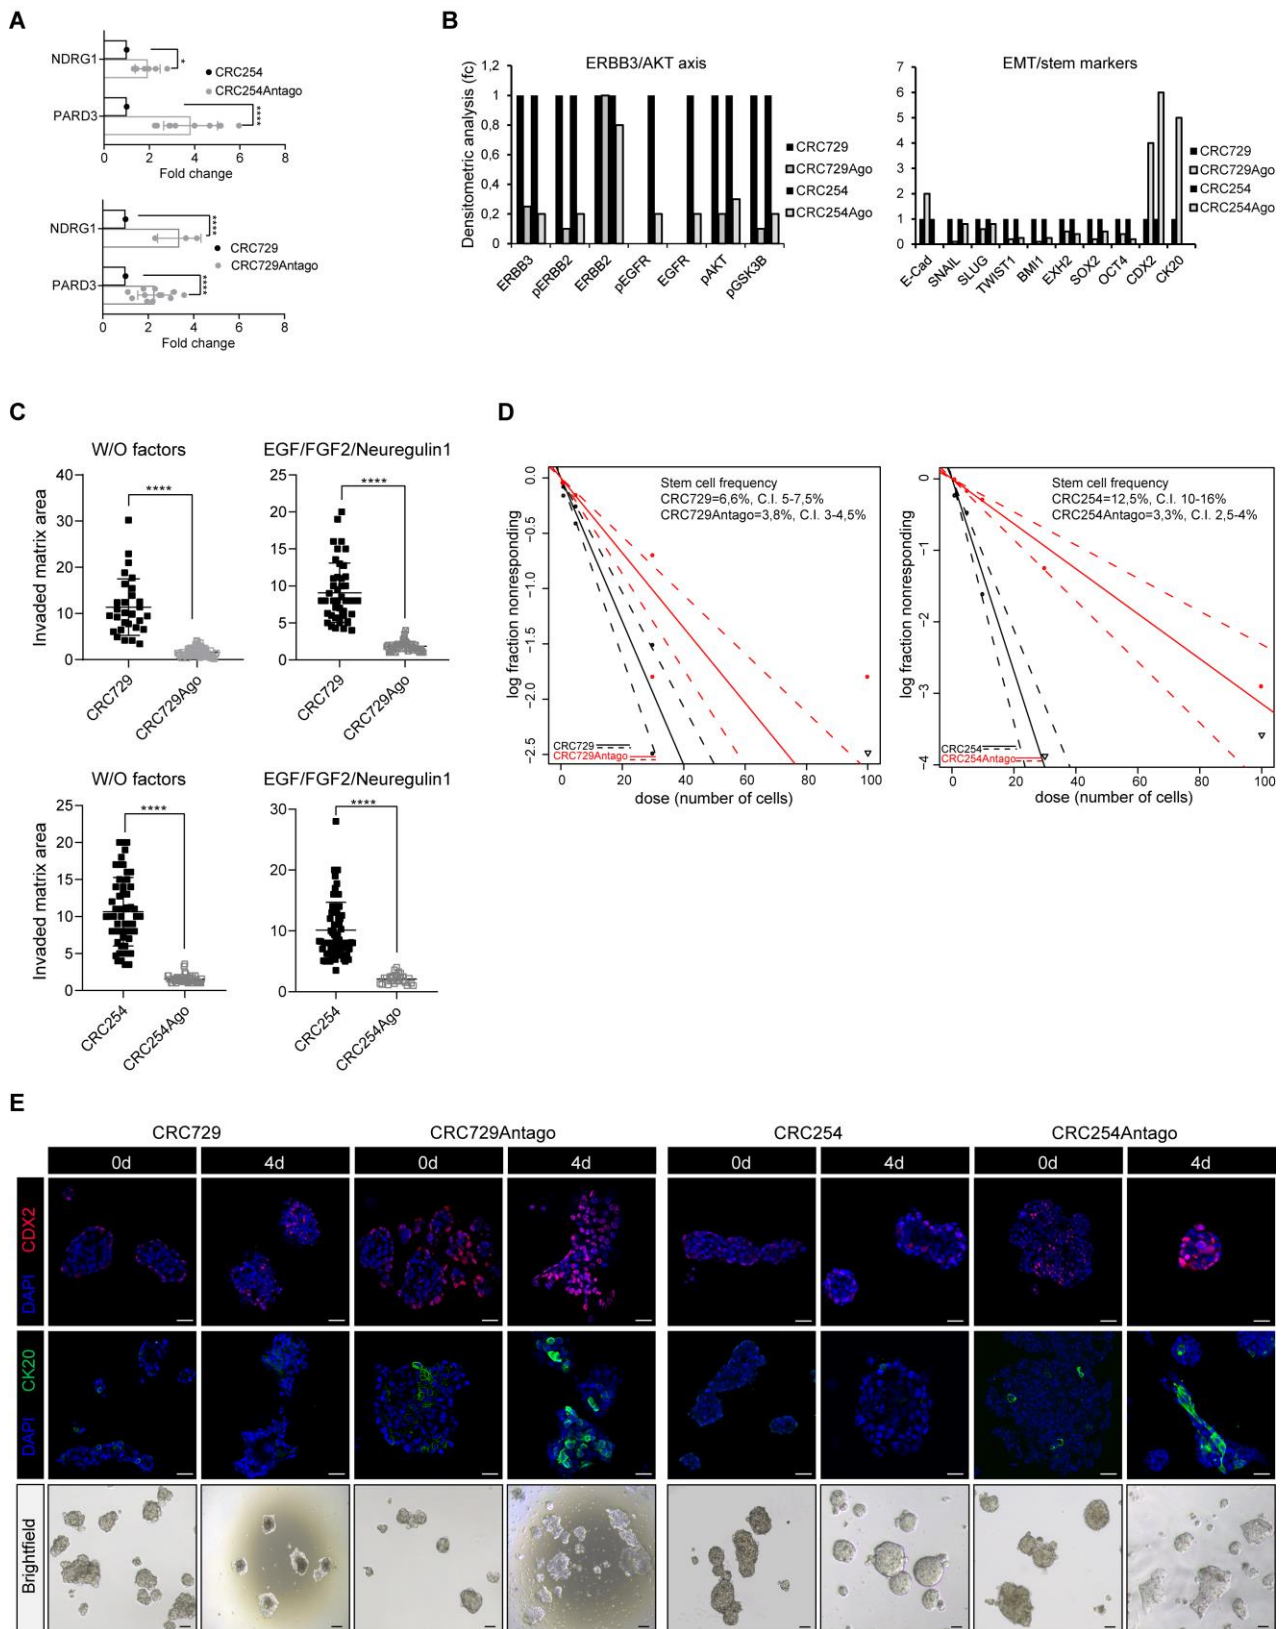

**Fig. S5.** AntagomiRNA-483-3p upregulates NDRG1, impairs ERBB3 activity and inhibits invasive and tumorigenic properties in m-colospheres endogenously overexpressing miRNA-483-3p. **A** *NDRG1* and *PARD3* mRNA expression in parental CRC729 and CRC254, and in CRC729 and CRC254 transduced with AntagomiRNA-483-3p. Upper panel: CRC254 vs CRC254Antago, *NDRG1* \*,  $P=0.0371$ ; *PARD3* \*\*\*\*,  $P<0.0001$ . Lower panel: CRC729 vs CRC729Antago, *NDRG1*\*\*\*\*, *PARD3* \*\*\*\*,  $P<0.0001$ ; one-way ANOVA). **B** Densitometric analyses of western blots shown in Fig. 5A (left) and 5F (right) (n = 3). **C** Morphometric analyses of areas invaded by colospheres in 3D assays shown in Fig. 5D (n = 3). Top: CRC729 and CRC729Antago. Bottom: CRC254 and CRC254Antago. Box plots represent fold change of areas invaded by each spheroid (dots) at day 4 vs day 0 (n = 3) (CRC729 vs. CRC729Antago w/o factors: \*\*\*\*,  $P<0.0001$ ; CRC729 vs. CRC729Antago EFN: \*\*\*\*,  $P<0.0001$ ; CRC254 vs. CRC254Antago w/o factors: \*\*\*\*,  $P<0.0001$ ; CRC254 vs. CRC254Antago: \*\*\*\*,  $P<0.0001$ ; ANOVA Bonferroni Multicomparison test). **D** In vitro limiting dilution sphere-forming assay. For each m-colosphere, plots generated by the ELDA software are shown, reporting the estimated stem cell frequency (percentage of clonogenic cells) with confidence intervals (C.I.) Left: CRC729 and CRC729Antago. Right: CRC254 and CRC254Antago. **E** Differentiation assay. M-colospheres were cultured for 4 days in pro-differentiating conditions (adhesive substrate and basal medium containing 10% FBS). Immunofluorescent stainings for CDX2 and CK20 and bright field acquisition are shown. Nuclei were counterstained with DAPI. Scale bar: 50  $\mu\text{m}$  (n=3).

## 2. Supplementary Tables

**Table S1.** List of probes, primers and lentiviral constructs.

| <b>Probe</b>                                   | <b>Source</b>            | <b>Identifier</b>      |
|------------------------------------------------|--------------------------|------------------------|
| TaqMan® miRNA assay                            | Thermo Fisher Scientific | hsa-miR-483-3p         |
| TaqMan® miRNA assay RNU48                      | Thermo Fisher Scientific | ID001006               |
| IGF2IN                                         | Thermo Fisher Scientific | Hs01005963_m1          |
| SNAI1                                          | Thermo Fisher Scientific | Hs00195591_m1          |
| NANOG                                          | Thermo Fisher Scientific | Hs02387400_g1          |
| EZH2                                           | Thermo Fisher Scientific | Hs01016789_m1          |
| BMI1                                           | Thermo Fisher Scientific | Hs00995536_m1          |
| EGFR                                           | Thermo Fisher Scientific | Hs01076078_m1          |
| ERBB2                                          | Thermo Fisher Scientific | Hs01001580_m1          |
| ERBB3                                          | Thermo Fisher Scientific | Hs00176538_m1          |
| NDRG1                                          | Thermo Fisher Scientific | Hs00608387_m1          |
| NDRG1                                          | Thermo Fisher Scientific | Hs00608388_m1          |
| NDRG1                                          | Thermo Fisher Scientific | Hs00608389_m1          |
| UBC                                            | Thermo Fisher Scientific | Hs00824723_m1          |
| GADPH                                          | Thermo Fisher Scientific | Hs99999905_m1          |
| TBP                                            | Thermo Fisher Scientific | Hs00427621_m1          |
| B2M                                            | Thermo Fisher Scientific | Hs00187842_m1          |
| ACTB                                           | Thermo Fisher Scientific | Hs99999903_m1          |
| <b>Primers</b>                                 |                          | <b>5'-3' SEQUENCE</b>  |
| CDH1-fw                                        | SIGMA-ALDRICH            | TTGAAAGAGAAACAGGATGGCT |
| CDH1-rev                                       | SIGMA-ALDRICH            | TCATTCTGATCGGTTACCGTGA |
| NDRG1-fw                                       | SIGMA-ALDRICH            | GACATGCAGGCACCTCTTTT   |
| NDRG1-rev                                      | SIGMA-ALDRICH            | CCTGCTTTTGCTGCACATTA   |
| PAR3-fw                                        | SIGMA-ALDRICH            | CATACGCTTGTTCCGGTCCTG  |
| PAR3                                           | SIGMA-ALDRICH            | TCATGATAGACACAGGGCCA   |
| GAPDH-fw                                       | SIGMA-ALDRICH            | CCCTTCATTGACCTCAACTACA |
| GAPDH -rev                                     | SIGMA-ALDRICH            | ATGACAAGCTTCCCGTTCTC   |
| TBP-fw                                         | SIGMA-ALDRICH            | CTTCGGAGAGTTCTGGGATTG  |
| TBP-rev                                        | SIGMA-ALDRICH            | CACGAAGTGCAATGGTCTTTAG |
| <b>Lentiviral constructs and plasmids</b>      |                          |                        |
| Lentivector-based MicroRNA Precursor construct | System Biosciences       | PMIRH483-3P PA/AA1     |
| miRZIP Lentiviral-based anti-microRNAs         | System Biosciences       | MZIP483-3P PA/AA1      |
| pLV[shRNA]-EGFP>Scramble_shRNA                 | Vector Builder           | VB010000-0009mxc       |
| pLV[shRNA]-EGFP>hNDRG1[shRNA#3]                | Vector Builder           | VB900080-6671zte       |
| pLV[shRNA]-EGFP>hNDRG1[shRNA#4]                | Vector Builder           | VB210902-1282umu       |
| pLV[shRNA]-EGFP>hNDRG1[shRNA#5]                | Vector Builder           | VB210902-1283vpc       |
| miTarget™ miRNA 3' UTR NDRG1 WT                | GeneCopoeia              | HmiT120908-MT06        |
| miTarget™ miRNA 3' UTR NDRG1 Mut               | GeneCopoeia              | CS-HmiT120908-MT06-01  |
| pEZX-MT06-Luc empty vector                     | GeneCopoeia              | CmiT000001-MT06        |

**Table S2.** List of antibodies.

| <b>Antibody (cat Number)</b>                                               | <b>Concentrations</b>             | <b>Company</b>              | <b>RRID</b> |
|----------------------------------------------------------------------------|-----------------------------------|-----------------------------|-------------|
| AKT (9272)                                                                 | 1:1000 WB                         | Cell Signaling Tech.        | AB_329827   |
| Actin beta (D6A8)                                                          | 1:10000 WB                        | Cell Signaling Tech.        | AB_2797972  |
| BMI1, clone D20B, (6964)                                                   | 1:100 IF; 1:1000 WB               | Cell Signaling Tech.        | AB_10828713 |
| Caspase-3 (9662S)                                                          | 1:1000 WB                         | Cell Signaling Tech.        | AB_331439   |
| CDX2 (32977S)                                                              | 1:100 IF; 1:1000 WB               | Cell Signaling Tech.        | AB_2077043  |
| EGF Receptor, clone D38B1( 4267)                                           | 1:100 IF; 1:1000 WB               | Cell Signaling Tech.        | AB_2246311  |
| EZH2 (5246)                                                                | 1:100 IF; 1:1000 WB               | Cell Signaling Tech.        | AB_10694683 |
| HER3, clone1B2 (4754)                                                      | 1:1000 WB                         | Cell Signaling Tech.        | AB_10691324 |
| NANOG (4903)                                                               | 1:1000 WB                         | Cell Signaling Tech.        | AB_10559205 |
| p-AKT Ser473, clone 736E16 (3787)                                          | 1:1000 WB                         | Cell Signaling Tech.        | AB_331170   |
| p-EGFR Y1068, clone 15A2 (2234)                                            | 1:100 IF; 1:1000 WB               | Cell Signaling Tech.        | AB_331701   |
| p-GSK-3 $\beta$ (Ser9) (D85E12)                                            | 1:1000 WB                         | Cell Signaling Tech.        | AB_2798445  |
| p-HER3 Y1289 (4791)                                                        | 1:1000 WB                         | Cell Signaling Tech.        | AB_2099709  |
| p-p38 T180/Y182 (9215)                                                     | 1:1000 WB                         | Cell Signaling Tech.        | AB_331762   |
| pHER2 Y1248 (2247)                                                         | 1:1000 WB                         | Cell Signaling Tech.        | AB_331725   |
| pMEK1/2 S217/221 (9154)                                                    | 1:1000 WB                         | Cell Signaling Tech.        | AB_2138017  |
| YAP/TAZ, clone D24E4 (8418)                                                | 1:1000 WB; 1:50 IHC               | Cell Signaling Tech.        | AB_10950494 |
| E-Cadherin (610182)                                                        | 1:1000 WB; 1:100 IF;<br>1:100 IHC | BD                          | AB_397581   |
| MET (C-12)                                                                 | 1:1000 WB                         | Santa Cruz                  | AB_631940   |
| SNAI 1 (H130)                                                              | 1:1000 WB                         | Santa Cruz                  | AB_2239533  |
| SLUG, clone A-7 (sc-166476)                                                | 1:1000 WB; 1:50 IHC               | Santa Cruz<br>Biotechnology | AB_2191897  |
| ERBB3, (05-390)                                                            | 1:100 IF                          | Millipore                   | AB_11211839 |
| OCT4, clone 10H11.2 (MAB4401)                                              | 1:1000 WB                         | Millipore                   | AB_2167852  |
| Vimentin (CBI202)                                                          | 1:100 IF; 1:1000 WB               | Millipore                   | AB_93387    |
| Twist1 (T6451)                                                             | 1:1000 WB                         | SIGMA                       | AB_609890   |
| ZEB1 (HPA027524)                                                           | 1:1000 WB; 1:1000<br>IHC          | SIGMA                       | AB_1844977  |
| NDRG1 (AB-80570)                                                           | 1:1000 WB; 1:50 IHC               | Immunological sci.          | AB_2892071  |
| pIGF1R Y1161 (ABP-0367)                                                    | 1:1000 WB                         | Immunological sci.          | AB_2861138  |
| pERK1/2 T202/Y204 (MAB94122)                                               | 1:1000 WB                         | Immunological sci.          | AB_2858271  |
| CDX2 (IR080)                                                               | ready to use, IHC                 | Agilent                     | AB_2858275  |
| Cytokeratin 20                                                             | 1:1000 WB                         | Abcam                       | AB_1310117  |
| Alexa Fluor 488 donkey anti rabbit Ig<br>H+L) (A21206)                     | 1:750 IF                          | Jackson Lab                 | AB_2535792  |
| Alexa Fluor 555 donkey anti mouse<br>Ig (H+L) (A31570)                     | 1:750 IF                          | Jackson Lab                 | AB_2535853  |
| Peroxidase-conjugated AffiPure Goat<br>Anti-Mouse IgG (H L) (115-035-003)  | 1:20000 WB                        | Jackson Lab                 | AB_10015289 |
| Peroxidase-conjugated AffiPure Goat<br>Anti-Rabbit IgG (H L) (111-035-003) | 1:20000 WB                        | Jackson Lab                 | AB_2313567  |

**Table S4.** Clinical and molecular data of metastatic colorectal cancer patients and m-colospheres.

| Case ID | Sex | Age  | OS  | Tumor stage and site | Genetic status         | IGF2 expression* | miR483-3p expr.# | M-colosphere derivation | M-colosphere availability |
|---------|-----|------|-----|----------------------|------------------------|------------------|------------------|-------------------------|---------------------------|
| CRC0030 | M   | 68   | 36  | IV, distal sigmoid   | Quadruple WT           | high             | high             | no                      | no                        |
| CRC0069 | M   | 69   | 23  | IV, rectal           | Quadruple WT           | high             | high             | no                      | no                        |
| CRC0081 | M   | 61   | 64  | IV, sigmoid          | Quadruple WT           | high             | high             | yes                     | yes                       |
| CRC0177 | F   | 59   | 88  | IV, sigmoid          | Quadruple WT           | high             | high             | yes                     | yes                       |
| CRC0202 | M   | 77   | 37  | III, rectal          | Quadruple WT           | high             | high             | yes                     | yes                       |
| CRC0254 | F   | 47   | 58  | IV, sigmoid          | Quadruple WT           | high             | high             | yes                     | yes                       |
| CRC0285 | M   | 63   | 49  | III, rectal-sigmoid  | Quadruple WT           | high             | high             | yes                     | yes                       |
| CRC0330 | F   | 51   | 54  | III, sigmoid         | KRAS G13D              | high             | high             | no                      | no                        |
| CRC0403 | n.a | n.a  | n.a | n.a                  | Quadruple WT           | high             | high             | yes                     | yes                       |
| CRC0442 | F   | 49   | 25  | IV, rectal           | Quadruple WT           | high             | high             | yes                     | yes                       |
| CRC0544 | M   | 75   | 41  | III,colon            | KRAS G12D              | high             | high             | yes                     | yes                       |
| CRC0705 | M   | 51   | n.a | IV, rectal           | KRAS G12V              | high             | high             | yes                     | yes                       |
| CRC0729 | F   | n.a. | 48  | n.a.                 | Quadruple WT           | high             | high             | yes                     | yes                       |
| CRC1063 | 47  | F    | 17  | IV ,colon            | BRAF K601E             | high             | high             | yes                     | yes                       |
| CRC1083 | 68  | F    | 30  | n.a.colon            | KRAS G13D              | high             | high             | yes                     | yes                       |
| CRC1090 | F   | 70   | n.a | n.a colon.           | KRAS G12V, PI3CA Q546K | high             | high             | no                      | no                        |
| CRC1449 | M   | 60   | n.a | n.a rectal           | Quadruple WT           | high             | high             | no                      | no                        |
| CRC0059 | F   | 81   | 29  | II, splenic flexure  | Quadruple WT           | low              | low              | no                      | no                        |
| CRC0078 | M   | 54   | 57  | IV, rectal-sigmoid   | Quadruple WT           | low              | low              | yes                     | yes                       |
| CRC0104 | F   | 64   | 34  | IV,colon             | PI3CA H1047R           | low              | low              | yes                     | yes                       |
| CRC0109 | M   | 73   | 90  | IV, rectal           | Quadruple WT           | low              | low              | yes                     | no                        |
| CRC0125 | F   | 51   | 18  | IV, sigmoid          | Quadruple WT           | low              | low              | yes                     | no                        |
| CRC0136 | F   | 50   | 79  | IV, colon            | Quadruple WT           | low              | low              | yes                     | no                        |
| CRC0147 | F   | 55   | 90  | IV, sigmoid          | Quadruple WT           | low              | low              | yes                     | no                        |
| CRC0148 | M   | 75   | 95  | III, sigmoid         | KRAS G12D              | low              | low              | no                      | no                        |
| CRC0151 | F   | 59   | 36  | III B, colon         | Quadruple WT           | low              | low              | yes                     | yes                       |
| CRC0152 | M   | 59   | 79  | IVA, lower rectal    | Quadruple WT           | low              | low              | yes                     | no                        |
| CRC0155 | M   | 70   | 41  | IV, rectal           | KRAS G12D              | low              | low              | no                      | no                        |
| CRC0167 | M   | 74   | 86  | IV, colon            | KRAS G12C              | low              | low              | yes                     | yes                       |
| CRC0179 | M   | 70   | 48  | IV, colon+sigmoid    | Quadruple WT           | low              | low              | yes                     | no                        |
| CRC0199 | F   | 65   | 16  | IV, cecum            | Quadruple WT           | low              | low              | no                      | no                        |
| CRC0252 | M   | 63   | 106 | IIA, colon           | Quadruple WT           | low              | low              | no                      | no                        |
| CRC0261 | M   | 55   | 24  | IVA, rectal          | KRAS G12V              | low              | low              | yes                     | yes                       |
| CRC0262 | M   | 63   | 42  | IV, rectal           | Quadruple WT           | low              | low              | yes                     | no                        |
| CRC0264 | M   | 69   | 72  | IV, splenic flexure  | Quadruple WT           | low              | low              | yes                     | yes                       |
| CRC0291 | M   | 71   | 22  | IV, colon            | KRAS G12D              | low              | low              | yes                     | yes                       |
| CRC0316 | F   | 66   | 25  | IV, rectal           | Quadruple WT           | low              | low              | no                      | no                        |
| CRC0322 | n.a | n.a  | n.a | n.a                  | Quadruple WT           | low              | low              | yes                     | yes                       |
| CRC0327 | M   | 57   | 145 | IV, sigmoid          | Quadruple WT           | low              | low              | yes                     | yes                       |
| CRC0394 | M   | 72   | 48  | IV,rectal            | Quadruple WT           | low              | low              | yes                     | yes                       |
| CRC0480 | F   | 68   | 72  | III B, sigmoid       | BRAF V600E             | low              | low              | yes                     | yes                       |
| CRC0574 | M   | 66   | 83  | IV, colon            | Quadruple WT           | low              | low              | yes                     | yes                       |
| CRC0578 | F   | 48   | n.a | n.a, colon           | Quadruple WT           | low              | low              | yes                     | yes                       |
| CRC0687 | F   | 49   | 44  | IV,cecum             | KRAS G13D              | low              | low              | yes                     | yes                       |
| CRC0721 | F   | 61   | n.a | n.a, colon           | KRAS Q61H              | low              | low              | yes                     | yes                       |

|         |   |      |      |                                 |              |     |     |     |     |
|---------|---|------|------|---------------------------------|--------------|-----|-----|-----|-----|
| CRC080  | M | 53   | 103  | IV, sigmoid                     | Quadruple WT | low | low | no  | no  |
| CRC1078 | F | 61   | 59   | III, rectal                     | KRAS G12D    | low | low | yes | yes |
| CRC1139 | F | 58   | 16   | IV, sigmoid,<br>splenic flexure | KRAS G12D    | low | low | yes | yes |
| CRC1145 | F | n.a. | 39   | n.a.                            | Quadruple WT | low | low | yes | no  |
| CRC1157 | M | n.a. | n.a. | n.a.                            | Quadruple WT | low | low | yes | no  |
| CRC1182 | F | 54   | 41   | IV, colon                       | KRAS G12A    | low | low | yes | yes |
| CRC1257 | M | 62   | 15   | IV, sigmoid                     | KRAS G12A    | low | low | yes | yes |
| CRC1313 | M | 65   | 12   | IV, sigmoid                     | Quadruple WT | low | low | yes | no  |
| CRC1331 | F | 57   | 32   | IV, splenic flexure             | Quadruple WT | low | low | yes | no  |
| CRC1342 | M | 47   | 48   | IV, rectal                      | Quadruple WT | low | low | yes | no  |
| CRC1430 | F | 60   | 58   | IIIB rectal sigmoid<br>junction | Quadruple WT | low | low | yes | yes |
| CRC1448 | M | 40   | 17   | IV, rectal                      | KRAS A146P   | low | low | yes | yes |

OS: overall survival (months)

\* As shown by Zanella et al., 2015

# As shown in Fig. S1B

n.a.: not available

Red: cases with high IGF2 expression and available m-colospheres

Blue: cases with low IGF2 expression and available m-colospheres

**Table S5.** Expression of miRNA-483-3p and IGF2 gene across 39 colorectal cancer celllines from the Cancer Cell Line (CCL) Encyclopedia dataset.

| miR-483-3p_exp | CCL_name | log10_miR-483-3p | log10_IGF2  | log_10_NDRG1 |
|----------------|----------|------------------|-------------|--------------|
| high           | SNU1033  | 2.242615958      | 3.684616036 | 1,662084453  |
| high           | C2BBE1   | 2.093876755      | 2.935909051 | 1,579718712  |
| high           | GP2D     | 2.233757363      | 2.871763419 | 1,001549363  |
| high           | LS1034   | 2.731306664      | 3.748422653 | 1,149757041  |
| high           | CL14     | 2.648252644      | 4.16025319  | 1,614654001  |
| low            | SW1116   | 1.36660971       | 0.299761227 | 1,7313715    |
| low            | SNUC2A   | 0.85672889       | 0.509278832 | 1,541971256  |
| low            | LS123    | 1.080626487      | 0.731098944 | 1,977677551  |
| low            | SNU1197  | 1.36567514       | 0.446535778 | 1,976420608  |
| low            | CW2      | 1.079543007      | 0.736977863 | 2,15497368   |
| low            | HT115    | 1.079181246      | 0.141759872 | 2,012895963  |
| low            | SNUC5    | 1.365862215      | 0.281328711 | 1,603149112  |
| low            | SNUC4    | 1.104828404      | 0.180335013 | 1,340978449  |
| low            | HCT15    | 1.382917135      | 0.187984223 | 1,534461874  |
| low            | SW1463   | 1.068185862      | 0.336489855 | 1,821987576  |
| low            | CCK81    | 1.439332694      | 0.570933516 | 1,614359121  |
| low            | LS513    | 1.261738547      | 0.249424409 | 1,747713163  |
| low            | SW837    | 1.42258984       | 0.810526077 | 1,457982591  |
| low            | HT55     | 0.933993164      | 0.45720862  | 1,703177439  |
| low            | MDST8    | 1.197280558      | 0.619699197 | 2,230362845  |
| low            | SNU81    | 1.286007122      | 0.282378684 | 2,38985357   |
| low            | SNU1040  | 1.148602655      | 0.660534771 | 2,260822374  |
| low            | HCC56    | 1.09482038       | 0.356822978 | 1,278629521  |
| low            | RCM1     | 1.137037455      | 0.465385852 | 2,358445336  |
| low            | RKO      | 0.965201701      | 0.149338799 | 1,166501789  |
| low            | HCT116   | 1.204391332      | 1.22245863  | 2,014128552  |
| low            | LS411N   | 0.873320602      | 0.071598687 | 1,63459177   |
| low            | SW48     | 1.214313897      | 0.460131583 | 2,110587472  |
| low            | LS180    | 1.192009593      | 0.196073526 | 1,604107444  |
| low            | SW403    | 1.068185862      | 0.292755089 | 2,004517531  |
| low            | NCIH747  | 1.067814511      | 0.685512057 | 1,366484825  |
| low            | SW1417   | 1.083144143      | 0.444752983 | 2,205547513  |
| low            | SW948    | 1.200029267      | 0.267994748 | 2,825992544  |
| low            | HT29     | 1.059563418      | 1.72286851  | 1,842418095  |
| low            | KM12     | 1.080626487      | 0.073065613 | 1,066054072  |
| low            | CL40     | 1.230959556      | 0.521262389 | 2,123476143  |
| low            | COLO320  | 1.020361283      | 0.465709773 | 0,747124188  |
| low            | CL11     | 1.100715087      | 0.420512363 | 2,342333884  |
| low            | CL34     | 1.036628895      | 0.336137475 | 2,090704528  |

### **3. Description of Table S3 (separate .xlsx file).**

Differentially expressed genes in CRC264, CRC264miR, CRC327 and CRC327miR; ensID (Ensembl ID), symbol (gene symbol), Log2FC (Fold Change), pvalue, FDR are shown.

Sheet 1: CRC2327 vs CRC327miR.

Sheet 2: CRC264 vs CRC264miR.
